# Supplementary material for: The genomic basis for colonizing the freezing Southern Ocean revealed by Antarctic toothfish and Patagonian robalo genomes
Source: PubMed Central journal article supplement (PMC6457430; doi:10.1093/gigascience/giz016), 2019-01-31
Supplement: giz016_reviewer_1_report_original_submission.pdf [file giz016_reviewer_1_report_original_submission.pdf]

## Reviewer Report

**Title: The genomic basis for colonizing the freezing Southern Ocean revealed by Antarctic toothfish and Patagonia robalo genomes**

**Version: Original Submission**    **Date: 10/2/2018**

**Reviewer name: Nicholas Jeffery**

### Reviewer Comments to Author:

Review of "Genomic bases for colonizing the freezing Southern Ocean revealed by the genomes of Antarctic toothfish and Patagonia robalo"

This manuscript sequences the genome and transcriptome of Antarctic toothfish and its closest temperate relative, the Patagonian robalo. The authors detect >200 protein gene families that have expanded with functions in stress response and freeze resistance. The amount of work conducted in this study is impressive. I applaud the authors for estimating the genome size using both the k-mer frequency distribution and flow cytometry to compare to the final assembly lengths. I am particularly interested in the expansion of transposable elements correlate to notothenioid diversification. I find no major flaws with the study, but would like to see more detail on the assembly steps (e.g. parameters tested and used in SoapDeNovo and SSPACE).

Minor comments:

Suggest a review for spelling and English grammar throughout the paper.

L69: is the >90% catch from commercial fisheries?

L141: do the authors know why both the scaffold and contig N50 lengths are so much lower in robalo compared to toothfish?

In Fig. 4 "kidney" is spelled incorrectly on the "caudal kidney" label

## Methods

Are the methods appropriate to the aims of the study, are they well described, and are necessary controls included? Choose an item.

## Conclusions

Are the conclusions adequately supported by the data shown? Choose an item.

## Reporting Standards

Does the manuscript adhere to the journal's guidelines on [minimum standards of reporting?](#) Choose an item.

Choose an item.

## Statistics

Are you able to assess all statistics in the manuscript, including the appropriateness of statistical tests used? Choose an item.

### **Quality of Written English**

Please indicate the quality of language in the manuscript: Choose an item.

### **Declaration of Competing Interests**

Please complete a declaration of competing interests, considering the following questions:

- Have you in the past five years received reimbursements, fees, funding, or salary from an organisation that may in any way gain or lose financially from the publication of this manuscript, either now or in the future?
- Do you hold any stocks or shares in an organisation that may in any way gain or lose financially from the publication of this manuscript, either now or in the future?
- Do you hold or are you currently applying for any patents relating to the content of the manuscript?
- Have you received reimbursements, fees, funding, or salary from an organization that holds or has applied for patents relating to the content of the manuscript?
- Do you have any other financial competing interests?
- Do you have any non-financial competing interests in relation to this paper?

If you can answer no to all of the above, write 'I declare that I have no competing interests' below. If your reply is yes to any, please give details below.

I declare that I have no competing interests

I agree to the open peer review policy of the journal. I understand that my name will be included on my report to the authors and, if the manuscript is accepted for publication, my named report including any attachments I upload will be posted on the website along with the authors' responses. I agree for my report to be made available under an Open Access Creative Commons CC-BY license (<http://creativecommons.org/licenses/by/4.0/>). I understand that any comments which I do not wish to be included in my named report can be included as confidential comments to the editors, which will not be published.

I agree to the open peer review policy of the journal

To further support our reviewers, we have joined with Publons, where you can gain additional credit to further highlight your hard work (see: <https://publons.com/journal/530/gigascience>). On publication of this paper, your review will be automatically added to Publons, you can then choose whether or not to claim your Publons credit. I understand this statement.

Yes Choose an item.
